# Supplementary material
Source: HighWire-hosted journal article supplement (https://cmajopen-stage.highwire.org/highwire/filestream/87959/field_highwire_adjunct_files/1/open-2021-0025-original-submission.pdf)
Supplement: open-2021-0025-original-submission.pdf [file open-2021-0025-original-submission.pdf]

**TITLE**

Epidemiology of Prescription Opioid Use among Metis in Manitoba

**AUTHORS & AFFILIATIONS**

<sup>1,2</sup>Nathan C. Nickel, <sup>2</sup>Carrie O'Conaill, <sup>3</sup>Julianne Sanguins, <sup>1</sup>Jennifer E. Enns, <sup>1,2</sup>Dan Chateau, <sup>2</sup>Michelle Driedger, <sup>1</sup>Carole Taylor, <sup>1</sup>Gilles Detillieux, <sup>1</sup>Miyosha Tso Deh, <sup>1</sup>Emily Brownell, <sup>1,4</sup>Alan Katz

<sup>1</sup>Manitoba Centre for Health Policy, Department of Community Health Sciences, Rady Faculty of Health Sciences, University of Manitoba

<sup>2</sup>Department of Community Health Sciences, Rady Faculty of Health Sciences, University of Manitoba

<sup>3</sup>Health & Wellness Department, Manitoba Metis Federation

<sup>4</sup>Department of Family Medicine, Rady Faculty of Health Sciences, University of Manitoba

**JOURNAL**

CMAJ - Maximum length: 2,500 words (longer only by agreement with the editor), excluding title page, abstract, figures, tables and references. <https://www.cmaj.ca/submission-guidelines#research>

**ABSTRACT**

**Background:** Canada is in the midst of an opioid crisis. Indigenous people, and specifically First Nations people, are among the populations hardest hit by opioid-related harms. However, to date there is no information available about opioid use in Metis populations in Canada. Without this evidence, Metis leadership are excluded from planning and implementing harm-reduction strategies in their communities. To address this knowledge gap, we examined the epidemiology and patterns of prescription opioid dispensations among Manitoba Metis.

**Methods:** We conducted a population-based, retrospective longitudinal study for fiscal years 2006/07-2017/18 using administrative data from the Manitoba Population Research Data Repository. Age- and sex-adjusted rates of prescription opioid dispensations were compared between Metis and All Other Manitobans (AOM).

**Results:** Between 2006-2018, the number of prescription opioid dispensations decreased among Metis (5.2%) and AOM (12.0%); the difference in this decrease between Metis and AOM was not significant ( $p=0.4927$ ). The mean number of days a person used a prescription opioid increased from 78 to 116 (48%) for Metis and 65 to 89 (37%) for AOM; the increase among Metis was significantly greater than among AOM ( $p<0.0001$ ). The use of highly potent opioids (e.g., fentanyl) trended upwards in both groups.

**Interpretation:** While the number of opioid prescriptions dispensed in Manitoba appears to be declining, use of stronger opioids and the duration of use is rising, particularly among Metis but also among AOM, likely contributing to opioid-related harms. The trend toward greater use of potent opioids is a concern for all Manitobans, but disproportionately affects Metis populations.

## INTRODUCTION

The opioid crisis in Canada is well-documented (1–3). Recent estimates of harms associated with opioid use show a 55% increase in opioid-related deaths from 2016-2018, with a total of 4,382 deaths in 2018 (4), and hospitalizations due to opioid poisonings climbed by 5% from 2016-2018, with 17.6 per 100,000 people hospitalized in 2018 (1,4). The highly addictive nature of opioids, together with the inappropriate prescribing practices often applied to them, are major contributors to the worsening opioid crisis (5).

Certain Canadian populations are at high risk of being negatively impacted by prescribed opioids. Indigenous people have been shown to have higher rates of hospitalizations from opioid poisonings than other Canadians (1). However, to date there have been no studies examining the impact of the opioid crisis among Metis specifically. Metis people are descendants of First Nations and European settlers who once governed a distinct nation in the northwest part of the continent. Canadian colonial laws and policies dispossessed the Metis of their lands and subjected them to many other damaging injustices. Despite these challenges, they remain resilient and resourceful, celebrating a rich cultural and social history (6), and they maintain their rights to self-determination and self-government.

Metis leaders consider the health and well-being of their people to be a top priority, but the lack of Metis-specific data on health issues like the opioid crisis act as a barrier to implementing effective public health harm-reduction and intervention strategies in their communities. In this study, researchers at the Manitoba Metis Federation (MMF) and the University of Manitoba have partnered to examine the epidemiology of the opioid crisis and to document patterns of prescription opioid use among Manitoba Metis.

## METHODS

### *Study Design*

We conducted a longitudinal, population-based, retrospective administrative data study of prescription opioid dispensations in the province of Manitoba. We compared the rate of opioid dispensations and the dose of opioid-associated morphine equivalents among Metis people and All Other Manitobans (AOM) in fiscal years 2006/07 and 2017/18, and examined trends in the dose of morphine equivalents over time from 2006/07 to 2017/18 by age, sex, income level, urbanicity, number of comorbidities and opioid type. Opioid-associated morphine equivalents,

1  
2  
3  
4  
5  
6  
7  
8  
9  
10  
11  
12  
13  
14  
15  
16  
17  
18  
19  
20  
21  
22  
23  
24  
25  
26  
27  
28  
29  
30  
31  
32  
33  
34  
35  
36  
37  
38  
39  
40  
41  
42  
43  
44  
45  
46  
47  
48  
49  
50  
51  
52  
53  
54  
55  
56  
57  
58  
59  
60

the cumulative intake of an opioid drug over a 24-hour period, allow for a standardized comparison of different types of opioids with different potency levels.

*Data Source*

The data were derived from the Manitoba Population Research Data Repository at the Manitoba Centre for Health Policy (MCHP), University of Manitoba. The Repository comprises over 90 databases that can be linked at the individual- and family-levels across databases and over time. It includes de-identified records for virtually every contact Manitobans make with the health care system as well as information on prescription drug dispensations from community pharmacies for >99% of Manitoba residents, including members of the Metis Nation. **Appendix Table 1** provides a description of the databases used in the study.

*Study Cohort*

The cohort included all people living in Manitoba at some point between 2006/07 and 2017/18 who were registered for health insurance. We excluded children under the age of ten. With permission from the MMF, we identified citizens of the Metis Nation by linking the Manitoba Metis Registry to the Repository at MCHP. The comparison group comprised All Other Manitobans (AOM), which included non-Indigenous residents of Manitoba as well as Inuit, First Nations and other individuals who were not in the Metis Registry (**Figure 1**).

*Measures*

To examine how prescription opioid dispensations have changed over the last 15 years, we calculated the rate of dispensations per 1,000 person-years, mean number of days individuals had an opioid prescription, mean morphine equivalents per user, and mean morphine equivalents per day among Metis and AOM in 2006/07 and 2017/18 with a 180 day washout period for each newly dispensed prescription. We also tested time trends in mean morphine equivalents per user among Metis and AOM (2006/07 to 2017/18); these were stratified by age, sex, urbanicity, number of comorbidities, income quintile and opioid type. Comorbidities were assessed using the Elixhauser Comorbidity Index, which categorizes patient comorbidities based on 31 different sets of International Classification of Diseases (ICD) diagnosis codes (7,8).

*Statistical Analysis*

Longitudinal time trend analyses were used to determine if the time trends were statistically significant. The t-statistic of each group's slope coefficient and its associated p-value were

tested at  $p=0.05$  to indicate whether the estimated slope was different from zero. All analyses were done using SAS Version 9.4.

### *Ethics*

The study was approved by the University of Manitoba Human Research Ethics Board (HS22883 – H2019:218), and the MMF provided a letter of support. The Health Information Privacy Committee (HIPC) of the Manitoba Government also reviewed and approved the study (HIPC No. 2019/20-16).

## **RESULTS**

### *Study Cohort Characteristics*

Socio-demographic characteristics (age, sex, income, physical and mental health comorbidities) of Metis people and AOM are presented in **Table 1**, with additional data on the Elixhauser comorbidity groupings presented in **Appendix Table 2**. While many of the two groups' characteristics were similar, AOM were more likely than Metis to live in urban areas and be in the wealthiest income quintiles. Compared to AOM, a higher proportion of Metis had been diagnosed with a mental health disorder, such as a mood/anxiety disorder and/or a substance use disorder, within the past five years.

### *Prescription Opioid Dispensations*

Comparisons of key indicators of prescription opioid dispensations between Metis and AOM in 2006/07 and 2017/18 are presented in **Table 2**, and the same indicators are shown stratified by opioid type in **Appendix Table 3**. Between 2006 and 2018, the rate of prescription opioid dispensations among Metis and AOM decreased by 5.2% and 12.0%, respectively. However, the mean number of days for which individuals were dispensed prescription opioids increased by 48% among Metis and 37% among AOM. Mean morphine equivalents (i.e., the potency of prescribed opioids) per user also increased (by 23% among Metis and by 16% among AOM), as did mean morphine equivalents per day (by 14% among Metis and 21% among AOM).

### *Time Trends in Opioid-Associated Morphine Equivalents*

**Figure 2** presents time trends in morphine equivalents (ME) per user, stratified by age, number of comorbidities, income quintile and opioid type; **Appendix Figure 1** shows these trends stratified by sex and urbanicity. Metis and AOM in the 45-54 year-old and 55-64 year-old groups had the highest mean ME per user, while individuals under 25 years had the lowest (**Figure 2a**). Metis and AOM living with three or more comorbidities had a higher mean ME per user than those living with two or fewer comorbidities (**Figure 2b**); however, since 2016, mean ME per

1  
2  
3 user has decreased among AOM (but not Metis) living with three or more comorbidities. There  
4 was substantial variation in ME per user by income quintile (**Figure 2c**); among AOM, an  
5 inverse gradient between mean ME and income quintile was evident, i.e., individuals living in  
6 the poorest income quintiles (Q1 and Q2) had the highest mean ME per user and vice versa,  
7 whereas among Metis, only those in the wealthiest income quintile (Q5) had a substantially  
8 lower ME per user until it began to climb in 2014.  
9  
10  
11  
12  
13 Among both Metis and AOM, hydromorphone and morphine were the opioids contributing the  
14 highest mean ME per user, but the ME per user associated with these drugs have been slowly  
15 decreasing over the past decade, while ME per user from codeine and fentanyl have gradually  
16 increased (**Figure 2d**). The ME per user from oxycodone and tramadol have also increased,  
17 although this trend is not obvious in **Figure 2d** and can be better seen in **Appendix Table 3**.  
18 Lastly, we examined the time trend of mean ME per user in the wealthiest income quintile alone  
19 because of the increasing ME per user of some opioid types and the upward trend among Q5  
20 Metis opioid users. Among Metis in Q5, there was a steep upward trend in ME per user from  
21 morphine from about 2013-2018 (**Figure 2e**), even though it declined among Metis overall. The  
22 increase in ME per user from oxycodone was also evident in this higher income group. Among  
23 AOM in Q5, the ME per user from oxycodone also increased but there was no corresponding  
24 rise in ME from morphine.  
25  
26  
27  
28  
29  
30  
31

32  
33 **INTERPRETATION**  
34

35 In Manitoba, the rate of prescription opioid dispensations among Metis and AOM has declined  
36 since 2007/08, but other measures of prescription opioid use point to the potential for increasing  
37 opioid-related harms, particularly among Metis. The duration of opioid prescriptions and the use  
38 of higher potency opioids have increased substantially in the last 15 years, leading to higher  
39 doses (higher morphine equivalents per user) being consumed by Manitobans. A large  
40 proportion of Manitobans with an opioid prescription are older (45-64 yrs) and are experiencing  
41 multiple health challenges concurrent with using opioids. And while we generally observed an  
42 inverse relationship between mean morphine equivalents per user and income level,  
43 prescription opioid dispensations among Metis in the wealthiest quintile are on the rise.  
44  
45  
46  
47  
48  
49

50 The overall decline of prescription opioid dispensations in Manitoba is in contrast to growing  
51 opioid use in many other parts of Canada (2,3,9), including British Columbia, Alberta, Yukon,  
52 and Northwest Territories (2). However, the increasing duration of opioid prescriptions and  
53 prescribing of highly potent opioids (e.g., fentanyl and oxycodone) in Manitoba is concerning. In  
54  
55  
56  
57  
58  
59  
60

British Columbia, longer duration of prescription opioid therapy and increased use of fentanyl, oxycodone and hydromorphone are also becoming more prevalent (10). Prescribing of high-dose and high-potency opioids has been shown to be strongly associated with opioid-related mortality (11). Our study also corroborates the finding that growing opioid use is not limited to illegal or street drug procurement (2). In Manitoba, the rate of opioid-related overdose among individuals with an active opioid prescription is 62.9%, while the rate of intentional overdose is 35.9%, and the prevalence of prescribing prior to an opioid-related hospitalization (52.2%) is among the highest in the country (3).

Our findings highlight the disproportionate burden of opioid-related harms in Indigenous communities in Canada. Our findings show that compared to other Manitobans, Metis had consistently higher rates of prescription opioid dispensations, were more likely to have a longer opioid prescription, and morphine equivalents per user were higher. Other Canadian research has shown that the age-standardized rate of opioid-related hospitalizations among Metis is more than three times higher than among other people living in Canada (34.3 vs 10.9 per 100,000 person-years) (1). The reasons for this discrepancy are related to the determinants of Indigenous health, among which a history of colonization and racism directed towards Metis has resulted in numerous harms that have made it challenging for Metis to access appropriate mental health supports and harm reduction treatments (12,13). Income, another critical determinant of health, likely also plays an important role in opioid-related harms among Metis and other Canadians. Our finding of an inverse income gradient in prescription opioid dispensations aligns with other Canadian studies showing that those living in lower income neighbourhoods tend to have higher rates of prescription opioid dispensations and are at higher risk for an opioid-related event, such as hospitalization (2,3,10). Additionally, the higher burden of comorbidities and the potentially higher prevalence of chronic pain among older individuals (Metis and AOM) may help to explain their disproportionate use of prescription opioids.

This study highlights the gravity of the opioid crisis in Manitoba, particularly among the Metis. The findings presented here provide critical information for Metis health leadership to plan interventions and advocate for better resources and supports for individuals at risk of opioid-related harms. The research team is currently working with the MMF to integrate the study findings into the current health policy landscape and develop Metis-specific strategies to eliminate the burden of the opioid crisis in Manitoba. Future research will explore in more detail the patterns of health and social outcomes associated with prescription opioid use and delve into physician prescribing practices. It would also be valuable to examine the epidemiology of

1  
2  
3  
4  
5  
6  
7  
8  
9  
10  
11  
12  
13  
14  
15  
16  
17  
18  
19  
20  
21  
22  
23  
24  
25  
26  
27  
28  
29  
30  
31  
32  
33  
34  
35  
36  
37  
38  
39  
40  
41  
42  
43  
44  
45  
46  
47  
48  
49  
50  
51  
52  
53  
54  
55  
56  
57  
58  
59  
60

pain-related disease and the various biological, psychological or socio-cultural mechanisms that drive people to seek health care for pain management.

A number of study limitations should be taken into consideration. The use of an administrative data repository as our main data source meant that we used opioid prescription dispensations as a proxy for opioid use; we did not have any information on whether dispensed opioids were taken as directed. As well, we examined prescription opioid dispensations only and were unable to investigate harms from opioid procurement by other means (e.g., black market, sharing, etc.).

Although Canada is facing a national opioid crisis, opioid-related harms disproportionately affect Metis populations in Manitoba, especially older individuals, those living in lower income neighbourhoods, and those living with multiple comorbidities. While rates of prescription opioid dispensations in the province are declining, other measures of harm have increased substantially. This study highlights the urgent need for better resources and the political will to tackle the Manitoba opioid crisis for once and for all.

Confidential



### **Acknowledgements**

We acknowledge the Manitoba government agencies and departments that provided the data used to conduct this study, including Manitoba Health, Seniors and Active Living (MHSAL), Vital Statistics, and the Winnipeg Regional Health Authority. We also acknowledge the support for this study provided by the President and Cabinet of the Manitoba Metis Federation. The results and conclusions are those of the authors, and no official endorsement by MHSAL or other data providers is intended or should be inferred.

### **Funding Statement**

This study was funded by the Public Health Agency of Canada through an agreement with the Manitoba Metis Federation (MMF). The Manitoba Centre for Health Policy was contracted by MMF to complete the analyses in this manuscript (UM project #54147). The funders had no input into the study design, implementation, or interpretation of the findings. The conclusions are those of the authors alone, and no official endorsement by the funders was intended or should be inferred.

### **Data Sharing Statement**

Data used in this study were derived from administrative health and social data as a secondary use. The data were provided to the Manitoba Centre for Health Policy (MCHP) under specific data sharing agreements only for approved use at MCHP. The original source data is not owned by the researchers or MCHP and as such cannot be provided to a public repository. The original data source and approval for use have been noted in the acknowledgments of the article. Where necessary, source data specific to this article or project may be reviewed at MCHP with the consent of the original data providers, along with the required privacy and ethical review bodies.

References

1. Carrière G, Garner R, Sanmartin C. Social and economic characteristics of those experiencing hospitalizations due to opioid poisonings. *Heal Reports*. 2018;29(10):23–8.

2. Belzak L, Halverson J. The opioid crisis in Canada: A national perspective. *Heal Promot chronic Dis Prev Canada* [Internet]. 2018;38(6):224–33. Available from: <https://pubmed.ncbi.nlm.nih.gov/29911818/><https://www.ncbi.nlm.nih.gov/pmc/articles/PMC6034966/>

3. Gomes T, Khuu W, Craiovan D, Martins D, Hunt J, Lee K, et al. Comparing the contribution of prescribed opioids to opioid-related hospitalizations across Canada: A multi-jurisdictional cross-sectional study. *Drug Alcohol Depend* [Internet]. 2018;191(July):86–90. Available from: <https://doi.org/10.1016/j.drugalcdep.2018.06.028>

4. Government of Canada. Opioid and Stimulant-related Harms in Canada [Internet]. Public Health Agency of Canada, Special Advisory Committee on the Epidemic of Opioid Overdoses. 2020 [cited 2020 Dec 20]. Available from: <https://health-infobase.canada.ca/substance-related-harms/opioids-stimulants>

5. Addiction CC on SU and. Canadian Drug Summary: Prescription Opioids [Internet]. 2020. Available from: <https://www.ccsa.ca/sites/default/files/2020-07/CCSA-Canadian-Drug-Summary-Prescription-Opioids-2020-en.pdf>

6. Manitoba Metis Federation Inc. Who Are the Metis? [Internet]. 2020 [cited 2020 Dec 20]. Available from: <https://www.manitobametis.com/who-are-the-metis/>

7. Elixhauser A, Steiner C, Harris DR. Comorbidity Measures for Use with Administrative Data Author ( s ): Anne Elixhauser , Claudia Steiner , D . Robert Harris and Rosanna M . Coffey Published by : Lippincott Williams & Wilkins Stable URL : <http://www.jstor.org/stable/3766985> Accessed : 26-07. *Med Care*. 1998;36(1):8–27.

8. Garland A, Fransoo R, Olafson K, Ramsey C, Yogendren M, Chateau D, et al. The Epidemiology and Outcomes of Critical Illness in Manitoba [Internet]. Winnipeg, MB; 2012. Available from: <https://www-deslibris-ca.uml.idm.oclc.org/ID/233695>

9. Canadian Institute for Health Information. Pan-Canadian Trends in the Prescribing of Opioids, 2012 to 2016 [Internet]. 2017. Available from: [https://secure.cihi.ca/free\\_products/pan-canadian-trends-opioid-prescribing-2017-en-web.pdf](https://secure.cihi.ca/free_products/pan-canadian-trends-opioid-prescribing-2017-en-web.pdf)

10. Smolina K, Gladstone E, Morgan S. Determinants of trends in prescription opioid use in British Columbia, Canada, 2005–2013. *Pharmacoepidemiol Drug Saf*. 2016;25(March):553–9.

11. Fischer B, Gooch J, Goldman B, Kurdyak P, Rehm J. Non-medical prescription opioid use, prescription opioid-related harms and public health in Canada: An update 5 years later. *Can J Public Heal*. 2014;105(2):1–3.

12. Bourassa C. *Metis Health: The Invisible Problem*. Kanata, ON: J Charlton Publishing; 2011.

13. Martens P, Bartlett J, Burland E, Prior H, Burchill C, Huq S, et al. Profile of Metis Health Status and Healthcare Utilization in Manitoba: A Population-Based Study [Internet]. Winnipeg, MB; 2010. Available from:

[http://www.mmf.mb.ca/docs/metis\\_health\\_status\\_report.pdf](http://www.mmf.mb.ca/docs/metis_health_status_report.pdf)

Confidential

Figure 1. Study Cohort

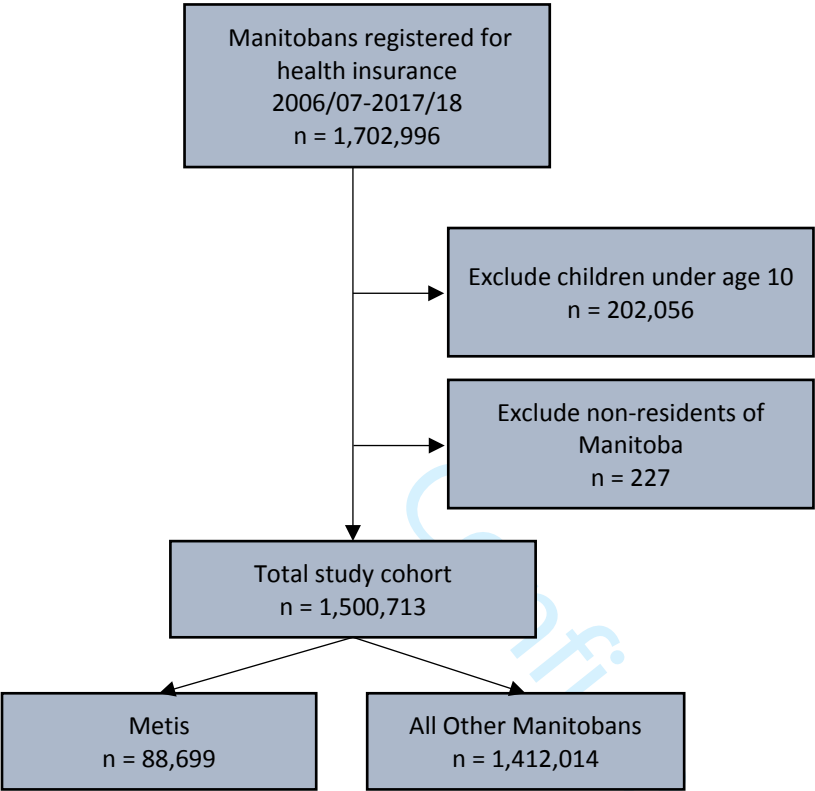

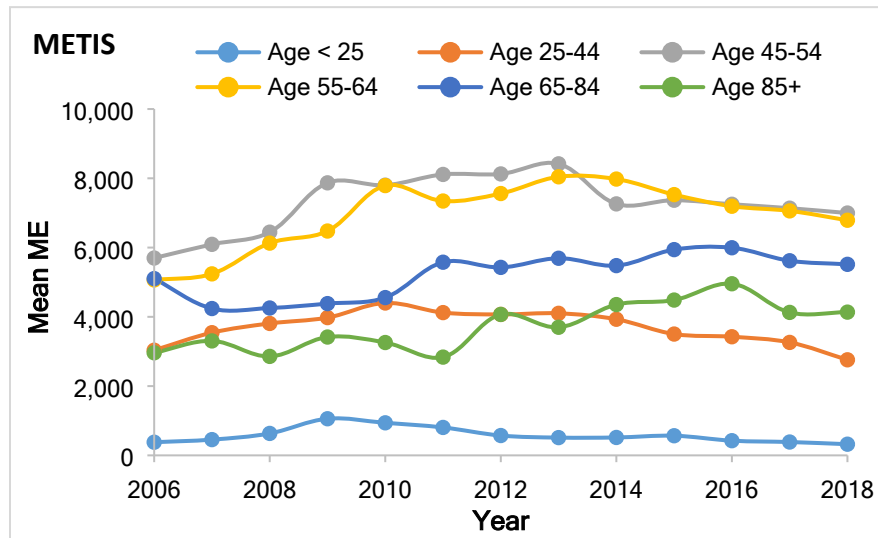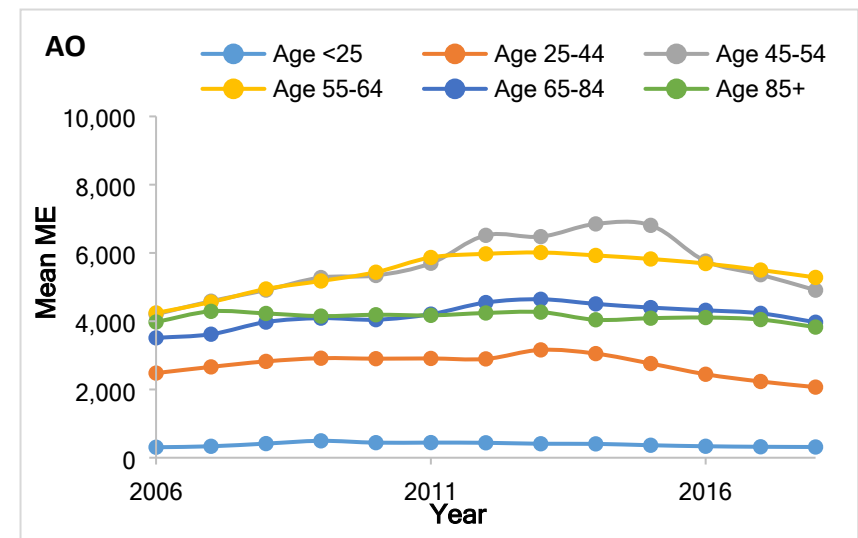

**Figure 2a. Trends in Prescription Opioid Morphine Equivalents among Metis and AOM – by Age**

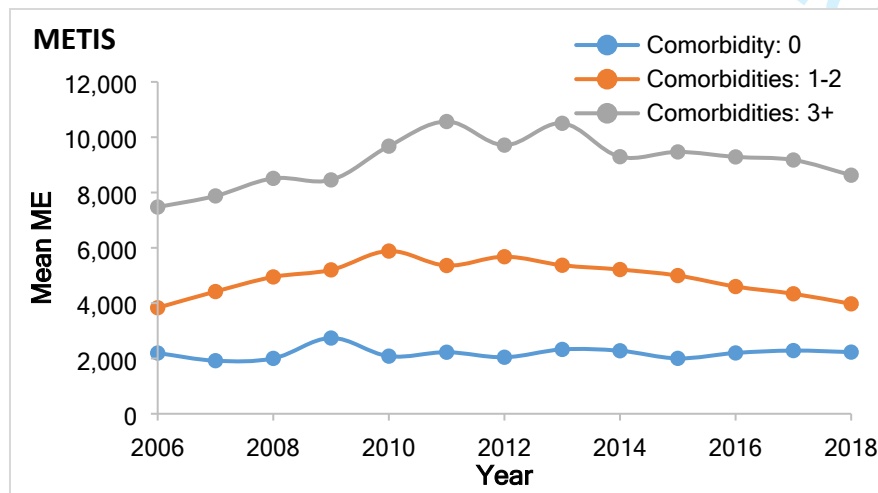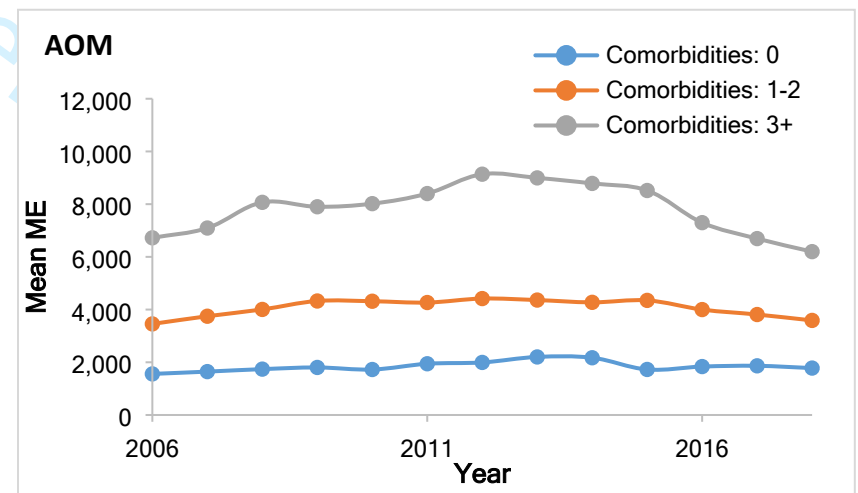

**Figure 2b. Trends in Prescription Opioid Morphine Equivalents among Metis and AOM – by Number of Comorbidities**

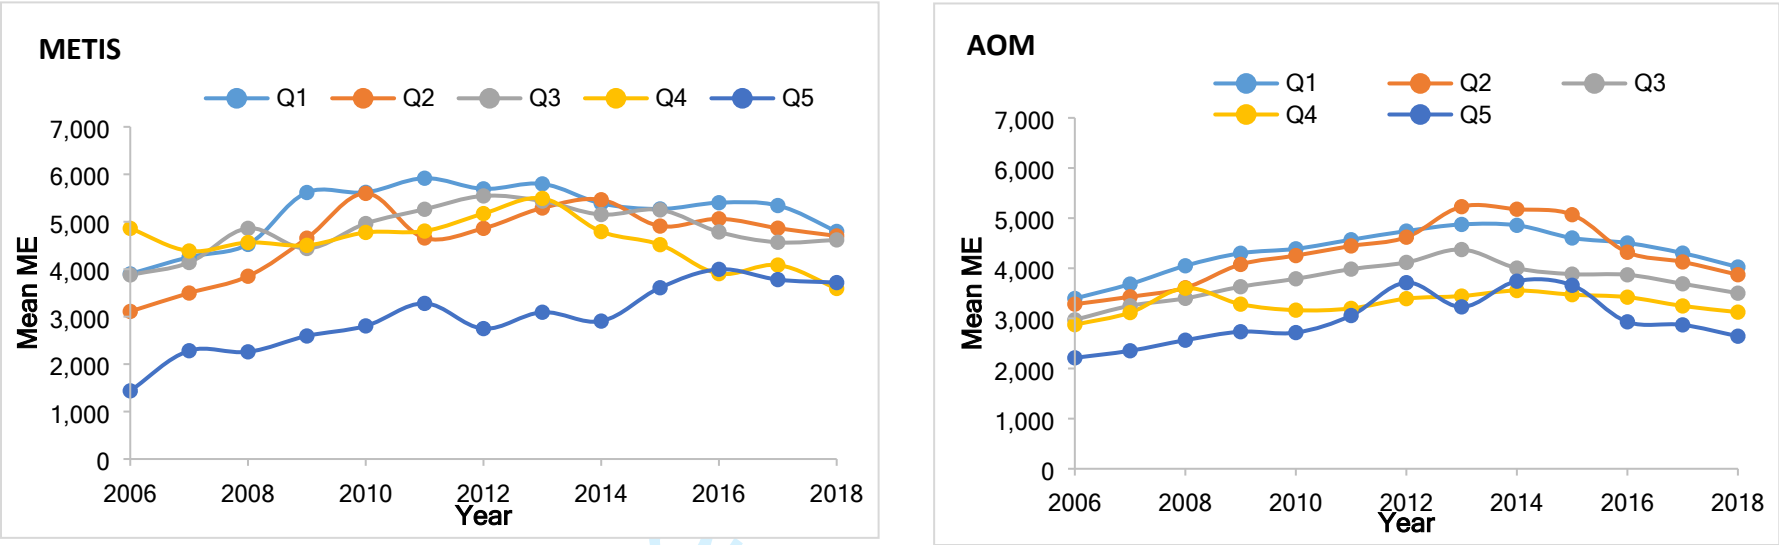

Figure 2c. Trends in Prescription Opioid Morphine Equivalents among Metis and AOM – by Income Quintile

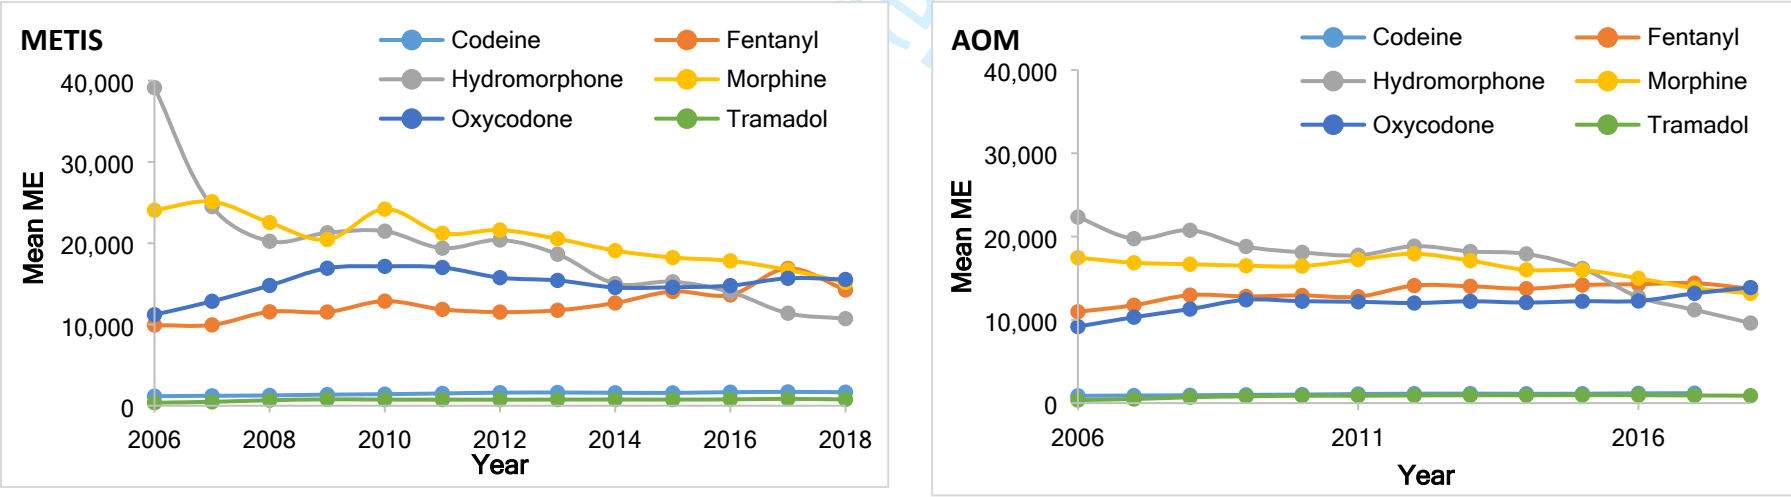

Figure 2d. Trends in Prescription Opioid Morphine Equivalents among Metis and AOM – by Opioid Type

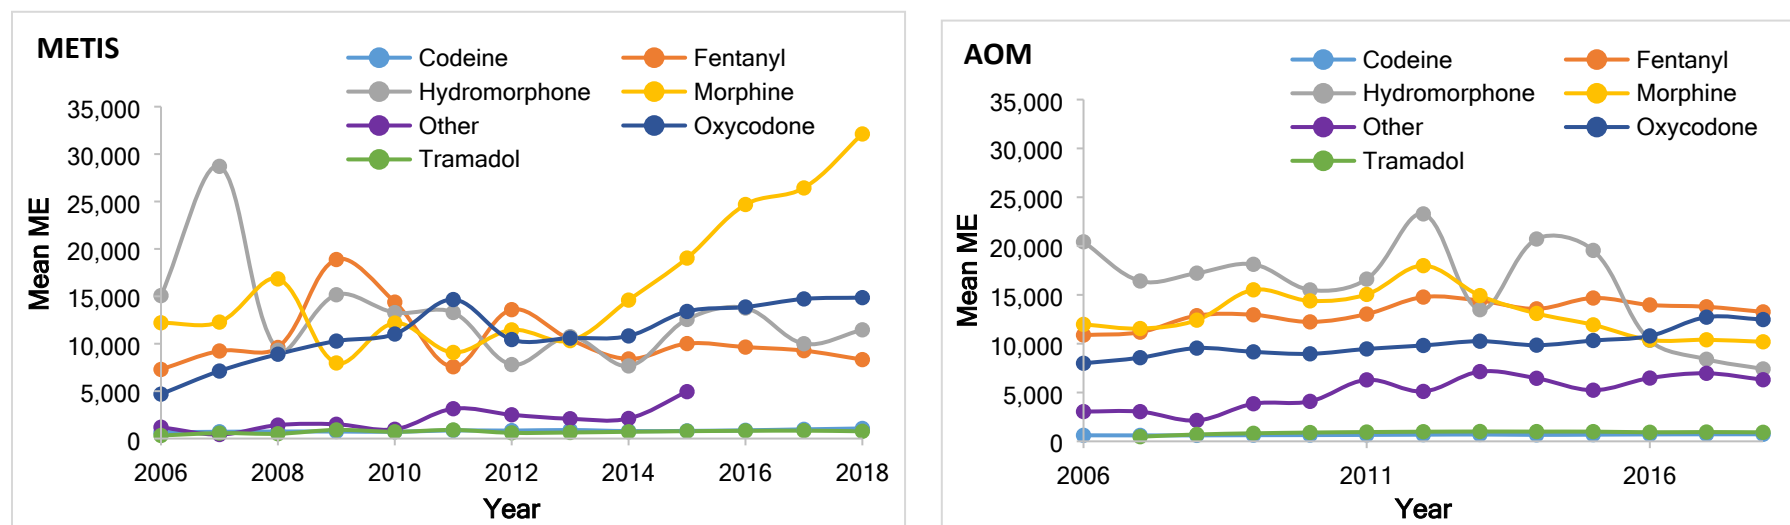

**Figure 2e. Trends in Prescription Opioid Morphine Equivalents among Metis and AOM in Income Quintile 5 Only – by Opioid Type**

1  
2  
3  
4  
5  
6  
7  
8  
9  
10  
11  
12  
13  
14  
15  
16  
17  
18  
19  
20  
21  
22  
23  
24  
25  
26  
27  
28  
29  
30  
31  
32  
33  
34  
35  
36  
37  
38  
39  
40  
41  
42  
43  
44  
45  
46  
47  
48  
49  
50  
51  
52  
53  
54  
55  
56  
57  
58  
59  
60

**Table 1. Study Cohort Characteristics (2006 and 2018)**

|                                 | 2006   |        |                      |        | 2018   |        |                      |        |
|---------------------------------|--------|--------|----------------------|--------|--------|--------|----------------------|--------|
|                                 | Metis  |        | All Other Manitobans |        | Metis  |        | All Other Manitobans |        |
|                                 | N      | %      | N                    | %      | N      | %      | N                    | %      |
| Total                           | 68,200 | 100.00 | 965,868              | 100.00 | 76,755 | 100.00 | 1,117,854            | 100.00 |
| Sex                             |        |        |                      |        |        |        |                      |        |
| Male                            | 33,241 | 48.74  | 473,525              | 49.03  | 37,456 | 48.80  | 552,842              | 49.46  |
| Female                          | 34,959 | 51.26  | 492,343              | 50.97  | 39,299 | 51.20  | 565,012              | 50.54  |
| Age                             |        |        |                      |        |        |        |                      |        |
| 85+                             | 438    | 0.64   | 23,858               | 2.47   | 1024   | 1.33   | 29,088               | 2.60   |
| 65 - 84                         | 6,217  | 9.12   | 130,945              | 13.56  | 9,962  | 12.98  | 175,697              | 15.72  |
| 55 - 64                         | 7,332  | 10.75  | 121,290              | 12.56  | 9,037  | 11.77  | 166,096              | 14.86  |
| 45 - 54                         | 9,817  | 14.39  | 166,199              | 17.21  | 9,815  | 12.79  | 160,239              | 14.33  |
| 25 - 44                         | 22,234 | 32.60  | 295,192              | 30.56  | 25,110 | 32.71  | 349,715              | 31.28  |
| < 25                            | 22,162 | 32.50  | 228,384              | 23.65  | 21,807 | 28.41  | 237,019              | 21.20  |
| Income Quintile                 |        |        |                      |        |        |        |                      |        |
| Q1                              | 16,653 | 24.42  | 182,958              | 18.94  | 18,411 | 23.99  | 212,822              | 19.04  |
| Q2                              | 13,848 | 20.30  | 190,642              | 19.74  | 16,022 | 20.87  | 220,666              | 19.74  |
| Q3                              | 13,117 | 19.23  | 193,081              | 19.99  | 15,848 | 20.65  | 225,411              | 20.16  |
| Q4                              | 13,275 | 19.46  | 192,468              | 19.93  | 14,341 | 18.68  | 224,349              | 20.07  |
| Q5                              | 10,979 | 16.10  | 197,764              | 20.48  | 11,259 | 14.67  | 225,654              | 20.19  |
| Not found                       | 328    | 0.48   | 8,955                | 0.93   | 874    | 1.14   | 8,952                | 0.80   |
| Urbanicity                      |        |        |                      |        |        |        |                      |        |
| Unknown                         | 328    | 0.48   | 8,955                | 0.93   | 874    | 1.14   | 8,952                | 0.80   |
| Urban                           | 31,732 | 46.53  | 597,919              | 61.90  | 35,304 | 46.00  | 702,640              | 62.86  |
| Rural                           | 36,140 | 52.99  | 358,994              | 37.17  | 40,577 | 52.87  | 406,262              | 36.34  |
| Elixhauser Comorbidity Index    |        |        |                      |        |        |        |                      |        |
| 0                               | 40,613 | 59.50  | 571,893              | 59.20  | 40,580 | 52.90  | 610,471              | 54.60  |
| 1-2                             | 24,146 | 35.40  | 347,053              | 35.93  | 29,042 | 37.84  | 415,535              | 37.17  |
| 3+                              | 3,441  | 5.05   | 46,922               | 4.86   | 7,133  | 9.29   | 91,848               | 8.22   |
| Mental Health                   |        |        |                      |        |        |        |                      |        |
| Any mental disorder diagnosis   | 17,264 | 25.31  | 208,418              | 21.58  | 22,541 | 29.37  | 255,088              | 22.82  |
| Mood/anxiety disorder diagnosis | 14,263 | 20.91  | 175,948              | 18.22  | 19,693 | 25.66  | 226,396              | 20.25  |



|                                  |       |      |        |      |       |      |        |      |
|----------------------------------|-------|------|--------|------|-------|------|--------|------|
| Personality disorder diagnosis   | 628   | 0.92 | 7,400  | 0.77 | 907   | 1.18 | 7,887  | 0.71 |
| Psychotic disorder diagnosis     | 855   | 1.25 | 15,230 | 1.58 | 1,261 | 1.64 | 15,358 | 1.37 |
| Suicide attempts                 | 335   | 0.49 | 2,514  | 0.26 | 296   | 0.39 | 2,024  | 0.18 |
| Substance use disorder diagnosis | 4,935 | 7.24 | 43,496 | 4.50 | 5,505 | 7.17 | 44,463 | 3.98 |

"Any mental disorder" comprises personality, psychotic, and mood and anxiety disorders. All indicators in the mental health category are measured over 5 years (2012/13-2017/18).

Confidential

1  
2  
3  
4  
5  
6  
7  
8  
9  
10  
11  
12  
13  
14  
15  
16  
17  
18  
19  
20  
21  
22  
23  
24  
25  
26  
27  
28  
29  
30  
31  
32  
33  
34  
35  
36  
37  
38  
39  
40  
41  
42  
43  
44  
45  
46  
47

Confidential

**Table 2. Relative Difference in Prescription Opioid Dispensations between Metis and All Other Manitobans**

|                                                             | <b>Metis</b> |             |               | <b>All Other Manitobans</b> |             |               | <b>Metis vs AOM</b>     |
|-------------------------------------------------------------|--------------|-------------|---------------|-----------------------------|-------------|---------------|-------------------------|
|                                                             | <b>2006</b>  | <b>2018</b> | <b>% Diff</b> | <b>2006</b>                 | <b>2018</b> | <b>% Diff</b> | <b>p-value (% Diff)</b> |
| <b>Rate of opioid dispensations/<br/>1,000 person-years</b> | 200.6        | 190.1       | -5.2          | 149.9                       | 131.9       | -12.0         | 0.4927                  |
| <b>Mean number of days/user</b>                             | 78           | 116         | 47.7          | 65                          | 89          | 36.9          | <0.0001                 |
| <b>Mean morphine equivalents/user</b>                       | 3,616        | 4,438       | 22.7          | 3,032                       | 3,511       | 15.8          | 0.2712                  |
| <b>Mean morphine equivalents/day</b>                        | 278          | 316         | 13.6          | 204                         | 247         | 21.2          | 0.8909                  |

Confidential

1  
2  
3  
4  
5  
6  
7  
8  
9  
10  
11  
12  
13  
14  
15  
16  
17  
18  
19  
20  
21  
22  
23  
24  
25  
26  
27  
28  
29  
30  
31  
32  
33  
34  
35  
36  
37  
38  
39  
40  
41  
42  
43  
44  
45  
46  
47  
48  
49  
50  
51  
52  
53  
54  
55  
56  
57  
58  
59  
60

**Appendix Table 1. Repository Databases Used in this Study**

| Database                             | Description                                                                                                                                                                                                                  |
|--------------------------------------|------------------------------------------------------------------------------------------------------------------------------------------------------------------------------------------------------------------------------|
| Manitoba Health Insurance Registry   | Demographic information on Manitoba residents registered for universal healthcare.                                                                                                                                           |
| Manitoba Metis Registry              | A registry of Metis citizens living in Manitoba.                                                                                                                                                                             |
| Vital Statistics                     | Mortality records and causes of death.                                                                                                                                                                                       |
| Hospital Discharge Abstract Database | Demographic and clinical information on hospitalized patients, including information on births and birth outcomes.                                                                                                           |
| Medical Services                     | Claims for physician visits in offices, hospitals and outpatient departments, fee-for-service components for tests such as lab and x-ray procedures performed in offices and hospitals, and payments for on-call agreements. |
| Drug Program Information Network     | Data on prescriptions dispensed from community pharmacies (but not pharmacies in hospitals or nursing homes/personal care homes).                                                                                            |
| Canada Census                        | Small geographical area-level data from the Canada Census, used to create the Socioeconomic Factor Index 2 (SEFI 2)*, an index of socio-economic status.                                                                     |

\*Chateau D, Metge C, Prior H, Soodeen RA. 2012. Learning from the census: The Socio-Economic Factor Index (SEFI) and health outcomes in Manitoba. Can J Public Health 103(8 Suppl 2): S23-7.

**Appendix Table 2: Study Cohort Characteristics – Elixhauser Comorbidity Groups**

|                                             | 2006  |       |                      |       | 2018   |       |                      |       |
|---------------------------------------------|-------|-------|----------------------|-------|--------|-------|----------------------|-------|
|                                             | Metis |       | All Other Manitobans |       | Metis  |       | All Other Manitobans |       |
|                                             | N     | %     | N                    | %     | N      | %     | N                    | %     |
| 1. Congestive Heart Failure                 | 580   | 0.85  | 10,428               | 1.08  | 756    | 0.98  | 12,228               | 1.09  |
| 2. Cardiac Arrhythmia                       | 820   | 1.20  | 16,956               | 1.76  | 1,347  | 1.75  | 23,214               | 2.08  |
| 3. Valvular Disease                         | 224   | 0.33  | 4,101                | 0.42  | 339    | 0.44  | 5,524                | 0.49  |
| 4. Pulmonary Circulation Disorders          | 58    | 0.09  | 1,040                | 0.11  | 136    | 0.18  | 1,774                | 0.16  |
| 5. Peripheral Vascular Disorders            | 439   | 0.64  | 6,806                | 0.70  | 627    | 0.82  | 9,048                | 0.81  |
| 6. Hypertension w/o complications           | 6,967 | 10.22 | 126,272              | 13.07 | 12,649 | 16.48 | 205,780              | 18.41 |
| 7. Hypertension with complications          | 96    | 0.14  | 1,579                | 0.16  | 52     | 0.07  | 1,019                | 0.09  |
| 8. Paralysis                                | 140   | 0.21  | 2,115                | 0.22  | 150    | 0.20  | 2,075                | 0.19  |
| 9. Other Neurological Disorders             | 676   | 0.99  | 12,009               | 1.24  | 1,229  | 1.60  | 17,842               | 1.60  |
| 10. Chronic Pulmonary Disease               | 6,988 | 10.25 | 81,496               | 8.44  | 6,617  | 8.62  | 78,476               | 7.02  |
| 11. Diabetes w/o complications              | 3,949 | 5.79  | 51,370               | 5.32  | 6,567  | 8.56  | 87,302               | 7.81  |
| 12. Diabetes with complications             | 146   | 0.21  | 1,730                | 0.18  | 730    | 0.95  | 8,141                | 0.73  |
| 13. Hypothyroidism                          | 1,339 | 1.96  | 20,366               | 2.11  | 2,604  | 3.39  | 44,087               | 3.94  |
| 14. Renal Failure                           | 292   | 0.43  | 5,238                | 0.54  | 458    | 0.60  | 7,149                | 0.64  |
| 15. Liver Disease                           | 508   | 0.74  | 6,259                | 0.65  | 948    | 1.24  | 13,364               | 1.20  |
| 16. Peptic Ulcer Disease excluding bleeding | 418   | 0.61  | 4,384                | 0.45  | 191    | 0.25  | 2,918                | 0.26  |
| 17. HIV/AIDS                                | 20    | 0.03  | 275                  | 0.03  | 85     | 0.11  | 1,088                | 0.10  |
| 18. Lymphoma                                | 107   | 0.16  | 2,037                | 0.21  | 149    | 0.19  | 2,666                | 0.24  |
| 19. Metastatic Cancer                       | 78    | 0.11  | 1,258                | 0.13  | 122    | 0.16  | 1,779                | 0.16  |
| 20. Solid Tumor without Metastasis          | 1,063 | 1.56  | 21,088               | 2.18  | 1,459  | 1.90  | 26,090               | 2.33  |
| 21. Rheumatoid Arthritis/Collagen           | 5,196 | 7.62  | 70,155               | 7.26  | 7,195  | 9.37  | 97,829               | 8.75  |
| 22. Coagulopathy                            | 214   | 0.31  | 3,384                | 0.35  | 280    | 0.36  | 4,819                | 0.43  |
| 23. Obesity                                 | 937   | 1.37  | 9,888                | 1.02  | 1,640  | 2.14  | 18,284               | 1.64  |
| 24. Weight Loss                             | 32    | 0.05  | 553                  | 0.06  | 64     | 0.08  | 986                  | 0.09  |

1  
2  
3  
4  
5  
6  
7  
8  
9  
10  
11  
12  
13  
14  
15  
16  
17  
18  
19  
20  
21  
22  
23  
24  
25  
26  
27  
28  
29  
30  
31  
32  
33  
34  
35  
36  
37  
38  
39  
40  
41  
42  
43  
44  
45  
46  
47  
48  
49  
50  
51  
52  
53  
54  
55  
56  
57  
58  
59  
60

|                                     |       |       |         |       |        |       |         |       |
|-------------------------------------|-------|-------|---------|-------|--------|-------|---------|-------|
| 25. Fluid and Electrolyte Disorders | 264   | 0.39  | 4,357   | 0.45  | 452    | 0.59  | 6,683   | 0.60  |
| 26. Blood Loss Anemia               | 23    | 0.03  | 325     | 0.03  | 10     | 0.01  | 129     | 0.01  |
| 27. Deficiency Anemia               | 518   | 0.76  | 8,262   | 0.86  | 1,822  | 2.37  | 27,501  | 2.46  |
| 28. Alcohol Abuse                   | 415   | 0.61  | 4,272   | 0.44  | 369    | 0.48  | 3,549   | 0.32  |
| 29. Drug Abuse                      | 917   | 1.34  | 7,786   | 0.81  | 1,624  | 2.12  | 11,188  | 1.00  |
| 30. Psychoses                       | 412   | 0.60  | 7,670   | 0.79  | 889    | 1.16  | 11,312  | 1.01  |
| 31. Depression                      | 9,068 | 13.30 | 114,807 | 11.89 | 13,322 | 17.36 | 154,743 | 13.84 |

Confidential

**Appendix Table 3. Relative Difference in Prescription Opioid Dispensations between Metis and AOM – by Opioid Type**

|               | Metis                                                               |        |        | All Other Manitobans |        |        | Metis                             |       |        | All Other Manitobans |      |        |
|---------------|---------------------------------------------------------------------|--------|--------|----------------------|--------|--------|-----------------------------------|-------|--------|----------------------|------|--------|
|               | Rate of prescription opioid dispensations<br>per 1,000 person-years |        |        |                      |        |        | Mean number of days per user      |       |        |                      |      |        |
| Opioid Type   | 2006                                                                | 2018   | % Diff | 2006                 | 2018   | % Diff | 2006                              | 2018  | % Diff | 2006                 | 2018 | % Diff |
| Codeine       | 183.8                                                               | 152.3  | -17.2  | 136.3                | 102.1  | -25.1  | 58                                | 87    | 50.4   | 43                   | 62   | 44.2   |
| Fentanyl      | 3.6                                                                 | 1.6    | -54.6  | 2.5                  | 1.2    | -53.1  | 192                               | 256   | 33.1   | 231                  | 245  | 6.3    |
| Hydromorphone | 3.5                                                                 | 14.6   | 314.9  | 3.3                  | 11.7   | 251.4  | 169                               | 116   | -31.1  | 166                  | 116  | -30.1  |
| Morphine      | 6.0                                                                 | 5.3    | -12.5  | 4.6                  | 3.1    | -31.8  | 174                               | 163   | -6.4   | 162                  | 161  | -1.1   |
| Oxycodone     | 17.5                                                                | 17.1   | -2.3   | 12.1                 | 8.1    | -32.7  | 146                               | 244   | 67.1   | 121                  | 210  | 73.6   |
| Tramadol      | 5.0                                                                 | 24.3   | 385.8  | 4.8                  | 21.2   | 339.9  | 20                                | 45    | 129.0  | 23                   | 51   | 123.5  |
| Other         | 2.6                                                                 | 0.5    | -81.7  | 1.2                  | 0.3    | -76.4  | 76                                | 217   | 184.6  | 73                   | 193  | 163.3  |
| TOTAL         | 200.6                                                               | 190.1  | -5.2   | 149.9                | 131.9  | -12.0  | 78                                | 116   | 47.7   | 65                   | 89   | 36.9   |
|               | Mean morphine equivalents per user                                  |        |        |                      |        |        | Mean morphine equivalents per day |       |        |                      |      |        |
| Opioid Type   | 2006                                                                | 2018   | % Diff | 2006                 | 2018   | % Diff | 2006                              | 2018  | % Diff | 2006                 | 2018 | % Diff |
| Codeine       | 1,172                                                               | 1,663  | 41.8   | 880                  | 1,193  | 35.5   | 91                                | 112   | 23.2   | 75                   | 87   | 15.2   |
| Fentanyl      | 9,917                                                               | 14,245 | 43.6   | 10,968               | 13,733 | 25.2   | 434                               | 936   | 115.8  | 587                  | 721  | 22.7   |
| Hydromorphone | 39,136                                                              | 10,711 | -72.6  | 22,336               | 9,615  | -57.0  | 3,655                             | 982   | -73.1  | 1,517                | 746  | -50.8  |
| Morphine      | 24,060                                                              | 15,182 | -36.9  | 17,462               | 13,179 | -24.5  | 1,766                             | 1,258 | -28.8  | 1,082                | 1042 | -3.7   |
| Oxycodone     | 11,202                                                              | 15,539 | 38.7   | 9,188                | 13,873 | 51.0   | 734                               | 951   | 29.5   | 496                  | 855  | 72.3   |
| Tramadol      | 366                                                                 | 773    | 111.2  | 365                  | 893    | 144.3  | 45                                | 56    | 23.4   | 42                   | 58   | 37.2   |
| Other         | 4,105                                                               | 24,325 | 492.6  | 3,709                | 6,366  | 71.6   | 982                               | 1,500 | 52.9   | 442                  | 382  | -13.5  |
| TOTAL         | 3,616                                                               | 4,438  | 22.7   | 3,032                | 3,511  | 15.8   | 278                               | 316   | 13.6   | 204                  | 247  | 21.2   |

“Other” opioids include meperidine, buprenorphine, butorphanol, pentazocine, sufentanil, tapentadol, dextropropoxyphene and opium.

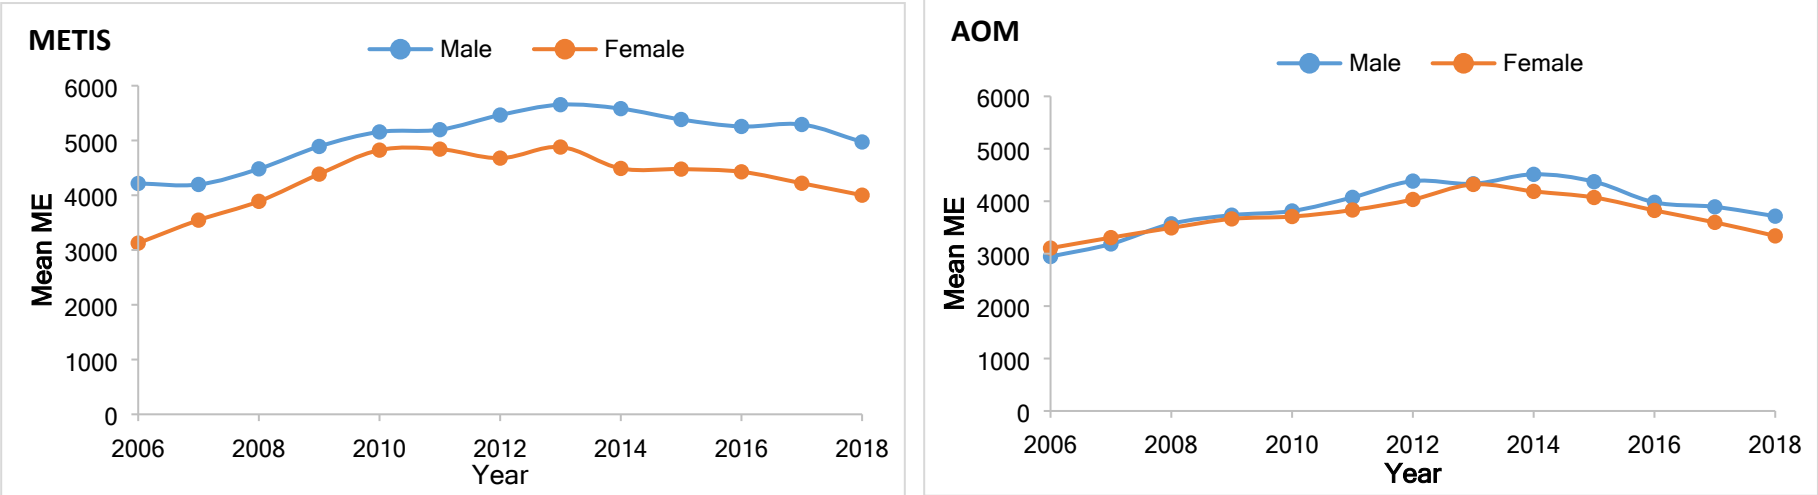

Appendix Figure 1a. Trends in Prescription Opioid Morphine Equivalents among Metis and AOM – by Sex

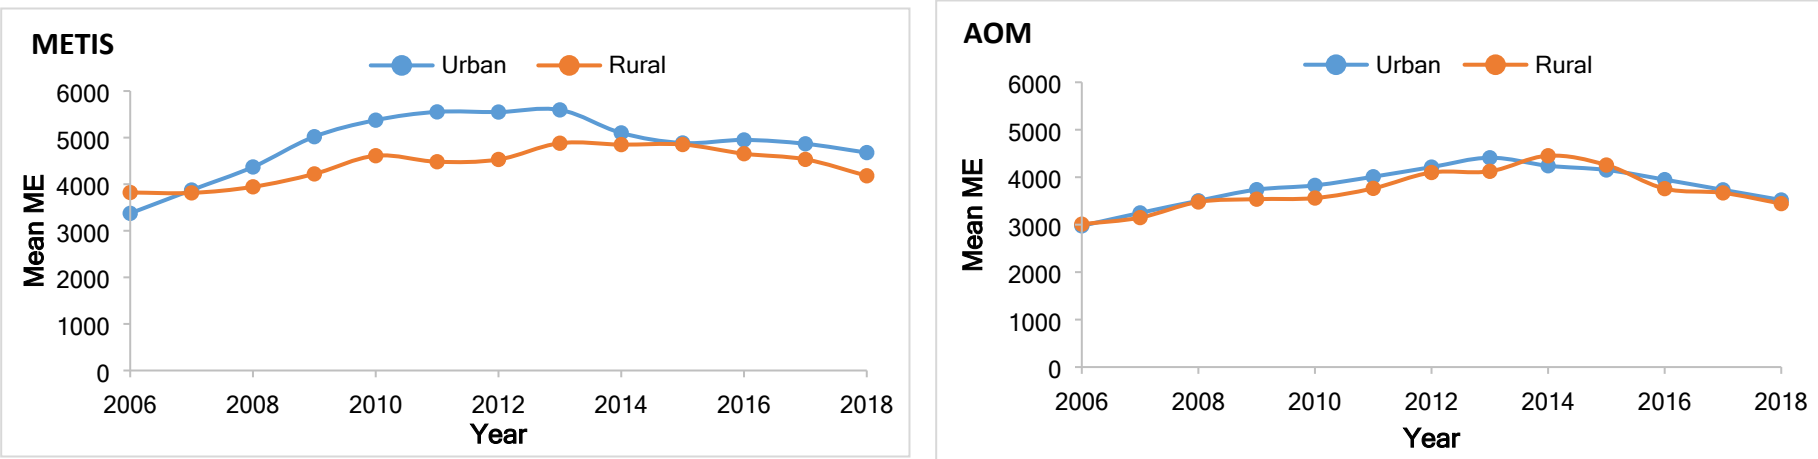

Appendix Figure 1b. Trends in Prescription Opioid Morphine Equivalents among Metis and AOM – by Urbanicity



**The RECORD statement – checklist of items extended from the STROBE statement that should be reported in observational studies using routinely collected health data.**

|                           | Item No. | STROBE items                                                                                                                                                                               | Location in manuscript where items are reported | RECORD items                                                                                                                                                                                                                                                                                                                                                                                                                                | Location in manuscript where items are reported                  |
|---------------------------|----------|--------------------------------------------------------------------------------------------------------------------------------------------------------------------------------------------|-------------------------------------------------|---------------------------------------------------------------------------------------------------------------------------------------------------------------------------------------------------------------------------------------------------------------------------------------------------------------------------------------------------------------------------------------------------------------------------------------------|------------------------------------------------------------------|
| <b>Title and abstract</b> |          |                                                                                                                                                                                            |                                                 |                                                                                                                                                                                                                                                                                                                                                                                                                                             |                                                                  |
|                           | 1        | (a) Indicate the study's design with a commonly used term in the title or the abstract (b) Provide in the abstract an informative and balanced summary of what was done and what was found | 1a. Abstract<br>1b. Abstract                    | RECORD 1.1: The type of data used should be specified in the title or abstract. When possible, the name of the databases used should be included.<br><br>RECORD 1.2: If applicable, the geographic region and timeframe within which the study took place should be reported in the title or abstract.<br><br>RECORD 1.3: If linkage between databases was conducted for the study, this should be clearly stated in the title or abstract. | 1.1 Abstract<br>1.2 Title and Abstract<br>1.3 Title and abstract |
| <b>Introduction</b>       |          |                                                                                                                                                                                            |                                                 |                                                                                                                                                                                                                                                                                                                                                                                                                                             |                                                                  |
| Background rationale      | 2        | Explain the scientific background and rationale for the investigation being reported                                                                                                       | pp. 3                                           |                                                                                                                                                                                                                                                                                                                                                                                                                                             |                                                                  |
| Objectives                | 3        | State specific objectives, including any prespecified hypotheses                                                                                                                           | pp. 3                                           |                                                                                                                                                                                                                                                                                                                                                                                                                                             |                                                                  |
| <b>Methods</b>            |          |                                                                                                                                                                                            |                                                 |                                                                                                                                                                                                                                                                                                                                                                                                                                             |                                                                  |
| Study Design              | 4        | Present key elements of study design early in the paper                                                                                                                                    | p. 4, "Study Design"                            |                                                                                                                                                                                                                                                                                                                                                                                                                                             |                                                                  |
| Setting                   | 5        | Describe the setting, locations, and relevant dates, including periods of recruitment, exposure, follow-up, and data collection                                                            | p. 4, "Study Cohort"                            |                                                                                                                                                                                                                                                                                                                                                                                                                                             |                                                                  |
| Participants              | 6        | (a) <i>Cohort study</i> - Give the eligibility criteria, and the                                                                                                                           | 6a. p. 4, "Study Cohort"                        | RECORD 6.1: The methods of study population selection (such as codes or                                                                                                                                                                                                                                                                                                                                                                     | 6.1 p. 4, "Study Cohort" and                                     |

|                              |   |                                                                                                                                                                                                                                                                                                                                                                                                                                                                                                                                                                                                                                                             |                                                                                            |                                                                                                                                                                                                                                                                                                                                                                                                                                                                                                                                                                                                                              |                                                                                             |
|------------------------------|---|-------------------------------------------------------------------------------------------------------------------------------------------------------------------------------------------------------------------------------------------------------------------------------------------------------------------------------------------------------------------------------------------------------------------------------------------------------------------------------------------------------------------------------------------------------------------------------------------------------------------------------------------------------------|--------------------------------------------------------------------------------------------|------------------------------------------------------------------------------------------------------------------------------------------------------------------------------------------------------------------------------------------------------------------------------------------------------------------------------------------------------------------------------------------------------------------------------------------------------------------------------------------------------------------------------------------------------------------------------------------------------------------------------|---------------------------------------------------------------------------------------------|
|                              |   | <p>sources and methods of selection of participants. Describe methods of follow-up</p> <p><i>Case-control study</i> - Give the eligibility criteria, and the sources and methods of case ascertainment and control selection. Give the rationale for the choice of cases and controls</p> <p><i>Cross-sectional study</i> - Give the eligibility criteria, and the sources and methods of selection of participants</p> <p><i>(b) Cohort study</i> - For matched studies, give matching criteria and number of exposed and unexposed</p> <p><i>Case-control study</i> - For matched studies, give matching criteria and the number of controls per case</p> | <p>6b. p. 4, “Study Cohort”</p>                                                            | <p>algorithms used to identify subjects) should be listed in detail. If this is not possible, an explanation should be provided.</p> <p>RECORD 6.2: Any validation studies of the codes or algorithms used to select the population should be referenced. If validation was conducted for this study and not published elsewhere, detailed methods and results should be provided.</p> <p>RECORD 6.3: If the study involved linkage of databases, consider use of a flow diagram or other graphical display to demonstrate the data linkage process, including the number of individuals with linked data at each stage.</p> | <p>“Data Source”</p> <p>6.2 p. 4, “Study Cohort” and “Data Source”</p> <p>6.3 Figure 1.</p> |
| Variables                    | 7 | <p>Clearly define all outcomes, exposures, predictors, potential confounders, and effect modifiers. Give diagnostic criteria, if applicable.</p>                                                                                                                                                                                                                                                                                                                                                                                                                                                                                                            | <p>p. 5-6 under “Measures”.</p>                                                            | <p>RECORD 7.1: A complete list of codes and algorithms used to classify exposures, outcomes, confounders, and effect modifiers should be provided. If these cannot be reported, an explanation should be provided.</p>                                                                                                                                                                                                                                                                                                                                                                                                       | <p>7.1 p. 4, “Measures”</p>                                                                 |
| Data sources/<br>measurement | 8 | <p>For each variable of interest, give sources of data and details of methods of assessment (measurement). Describe comparability of assessment methods if there is more than one group</p>                                                                                                                                                                                                                                                                                                                                                                                                                                                                 | <p>Data sources and measures are described on p. 4 under “Data Source” and “Measures”.</p> |                                                                                                                                                                                                                                                                                                                                                                                                                                                                                                                                                                                                                              |                                                                                             |
| Bias                         | 9 | <p>Describe any efforts to address potential sources of bias</p>                                                                                                                                                                                                                                                                                                                                                                                                                                                                                                                                                                                            | <p>We included a number of explanatory variables in our</p>                                |                                                                                                                                                                                                                                                                                                                                                                                                                                                                                                                                                                                                                              |                                                                                             |

|                                  |    |                                                                                                                                                                                                                                                                                                                                                                                                                                                                                                                                                                      |                                                                                                            |                                                                                                                                           |                                                            |
|----------------------------------|----|----------------------------------------------------------------------------------------------------------------------------------------------------------------------------------------------------------------------------------------------------------------------------------------------------------------------------------------------------------------------------------------------------------------------------------------------------------------------------------------------------------------------------------------------------------------------|------------------------------------------------------------------------------------------------------------|-------------------------------------------------------------------------------------------------------------------------------------------|------------------------------------------------------------|
|                                  |    |                                                                                                                                                                                                                                                                                                                                                                                                                                                                                                                                                                      | linear trend model to account for differences among study subjects – pp. 4-5 under “Statistical Analyses”. |                                                                                                                                           |                                                            |
| Study size                       | 10 | Explain how the study size was arrived at                                                                                                                                                                                                                                                                                                                                                                                                                                                                                                                            | p. 4, “Study Cohort” and Figure 1                                                                          |                                                                                                                                           |                                                            |
| Quantitative variables           | 11 | Explain how quantitative variables were handled in the analyses. If applicable, describe which groupings were chosen, and why                                                                                                                                                                                                                                                                                                                                                                                                                                        | pp. 4-5, “Statistical Analyses”                                                                            |                                                                                                                                           |                                                            |
| Statistical methods              | 12 | (a) Describe all statistical methods, including those used to control for confounding<br>(b) Describe any methods used to examine subgroups and interactions<br>(c) Explain how missing data were addressed<br>(d) <i>Cohort study</i> - If applicable, explain how loss to follow-up was addressed<br><i>Case-control study</i> - If applicable, explain how matching of cases and controls was addressed<br><i>Cross-sectional study</i> - If applicable, describe analytical methods taking account of sampling strategy<br>(e) Describe any sensitivity analyses | pp. 4-5, “Statistical Analyses”                                                                            |                                                                                                                                           |                                                            |
| Data access and cleaning methods |    |                                                                                                                                                                                                                                                                                                                                                                                                                                                                                                                                                                      |                                                                                                            | RECORD 12.1: Authors should describe the extent to which the investigators had access to the database population used to create the study | 12. 1 Data sources and access to the data are described on |

|                  |    |                                                                                                                                                                                                                                                                                                               |                                                                                                                                              |                                                                                                                                                                                                                                                                                                           |                                                                                                                                                                                                   |
|------------------|----|---------------------------------------------------------------------------------------------------------------------------------------------------------------------------------------------------------------------------------------------------------------------------------------------------------------|----------------------------------------------------------------------------------------------------------------------------------------------|-----------------------------------------------------------------------------------------------------------------------------------------------------------------------------------------------------------------------------------------------------------------------------------------------------------|---------------------------------------------------------------------------------------------------------------------------------------------------------------------------------------------------|
|                  |    |                                                                                                                                                                                                                                                                                                               |                                                                                                                                              | population.<br><br>RECORD 12.2: Authors should provide information on the data cleaning methods used in the study.                                                                                                                                                                                        | pp.4 under “Data Source”<br><br>12.2 Data quality assessment and cleaning procedures occur for all datasets at MCHP and are not part of this study. See cited validation studies for more detail. |
| Linkage          |    | ..                                                                                                                                                                                                                                                                                                            |                                                                                                                                              | RECORD 12.3: State whether the study included person-level, institutional-level, or other data linkage across two or more databases. The methods of linkage and methods of linkage quality evaluation should be provided.                                                                                 | pp. 4 under “Data Source”                                                                                                                                                                         |
| Results          |    |                                                                                                                                                                                                                                                                                                               |                                                                                                                                              |                                                                                                                                                                                                                                                                                                           |                                                                                                                                                                                                   |
| Participants     | 13 | (a) Report the numbers of individuals at each stage of the study (e.g., numbers potentially eligible, examined for eligibility, confirmed eligible, included in the study, completing follow-up, and analysed)<br>(b) Give reasons for non-participation at each stage.<br>(c) Consider use of a flow diagram | Not applicable for this retrospective analysis where our cohort includes only individuals who could be followed for the entire study period. | RECORD 13.1: Describe in detail the selection of the persons included in the study (i.e., study population selection) including filtering based on data quality, data availability and linkage. The selection of included persons can be described in the text and/or by means of the study flow diagram. | p. 4, “Study Cohort” and Figure 1                                                                                                                                                                 |
| Descriptive data | 14 | (a) Give characteristics of study participants (e.g., demographic, clinical, social) and information on exposures and potential confounders<br>(b) Indicate the number of participants with missing data                                                                                                      | Table 1 & 2 and p. 5                                                                                                                         |                                                                                                                                                                                                                                                                                                           |                                                                                                                                                                                                   |

|                   |    |                                                                                                                                                                                                                                                                                                                                                                                                                 |                                     |                                                                                                                                             |      |
|-------------------|----|-----------------------------------------------------------------------------------------------------------------------------------------------------------------------------------------------------------------------------------------------------------------------------------------------------------------------------------------------------------------------------------------------------------------|-------------------------------------|---------------------------------------------------------------------------------------------------------------------------------------------|------|
|                   |    | for each variable of interest<br>(c) <i>Cohort study</i> - summarise follow-up time (e.g., average and total amount)                                                                                                                                                                                                                                                                                            |                                     |                                                                                                                                             |      |
| Outcome data      | 15 | <i>Cohort study</i> - Report numbers of outcome events or summary measures over time<br><i>Case-control study</i> - Report numbers in each exposure category, or summary measures of exposure<br><i>Cross-sectional study</i> - Report numbers of outcome events or summary measures                                                                                                                            | Table 2-3, Figures 2-3, and pp. 5-6 |                                                                                                                                             |      |
| Main results      | 16 | (a) Give unadjusted estimates and, if applicable, confounder-adjusted estimates and their precision (e.g., 95% confidence interval). Make clear which confounders were adjusted for and why they were included<br>(b) Report category boundaries when continuous variables were categorized<br>(c) If relevant, consider translating estimates of relative risk into absolute risk for a meaningful time period | Table 2-3, Figures 2-3, and pp. 5-6 |                                                                                                                                             |      |
| Other analyses    | 17 | Report other analyses done - e.g., analyses of subgroups and interactions, and sensitivity analyses                                                                                                                                                                                                                                                                                                             | n/a                                 |                                                                                                                                             |      |
| <b>Discussion</b> |    |                                                                                                                                                                                                                                                                                                                                                                                                                 |                                     |                                                                                                                                             |      |
| Key results       | 18 | Summarise key results with reference to study objectives                                                                                                                                                                                                                                                                                                                                                        | p. 6                                |                                                                                                                                             |      |
| Limitations       | 19 | Discuss limitations of the study, taking into account sources of potential bias or imprecision. Discuss both direction and                                                                                                                                                                                                                                                                                      | p. 8                                | RECORD 19.1: Discuss the implications of using data that were not created or collected to answer the specific research question(s). Include | p. 8 |

1  
2  
3  
4  
5  
6  
7  
8  
9  
10  
11  
12  
13  
14  
15  
16  
17  
18  
19  
20  
21  
22  
23  
24  
25  
26  
27  
28  
29  
30  
31  
32  
33  
34  
35  
36  
37  
38  
39  
40  
41  
42  
43  
44  
45  
46  
47

|                                                           |    |                                                                                                                                                                            |        |                                                                                                                                                              |     |
|-----------------------------------------------------------|----|----------------------------------------------------------------------------------------------------------------------------------------------------------------------------|--------|--------------------------------------------------------------------------------------------------------------------------------------------------------------|-----|
|                                                           |    | magnitude of any potential bias                                                                                                                                            |        | discussion of misclassification bias, unmeasured confounding, missing data, and changing eligibility over time, as they pertain to the study being reported. |     |
| Interpretation                                            | 20 | Give a cautious overall interpretation of results considering objectives, limitations, multiplicity of analyses, results from similar studies, and other relevant evidence | p. 7   |                                                                                                                                                              |     |
| Generalisability                                          | 21 | Discuss the generalisability (external validity) of the study results                                                                                                      | p. 7-8 |                                                                                                                                                              |     |
| Other Information                                         |    |                                                                                                                                                                            |        |                                                                                                                                                              |     |
| Funding                                                   | 22 | Give the source of funding and the role of the funders for the present study and, if applicable, for the original study on which the present article is based              | p. 9   |                                                                                                                                                              |     |
| Accessibility of protocol, raw data, and programming code |    |                                                                                                                                                                            |        | RECORD 22.1: Authors should provide information on how to access any supplemental information such as the study protocol, raw data, or programming code.     | n/a |
